# Supplementary material for: Stretch induced photoluminescence enhanced perovskite quantum dot polymer composites
Source: Royal Society of Chemistry journal article supplement (doi:10.1039/c9tc05966k), 2019-12-09
Supplement: c9tc05966k1.pdf [file c9tc05966k1.pdf]

## Supporting Information

### Stretch induced photoluminescence enhanced perovskite quantum dot polymer composites

*Yiqin Gong,<sup>a</sup> Jianhua Shen,<sup>\*a</sup> Yihua Zhu,<sup>\*a</sup> Xiaoling Yang,<sup>b</sup> Ling Zhang<sup>a</sup> and  
Chunzhong Li<sup>\*c</sup>*

Dr. Y. Gong, Prof. J. Shen, Prof. Y. Zhu, Prof. L. Zhang  
Shanghai Engineering Research Center of Hierarchical Nanomaterials, Key Laboratory  
for Ultrafine Materials of Ministry of Education, School of Materials Science and  
Engineering, East China University of Science and Technology, 130 Meilong Road,  
Shanghai, 200237, China  
E-mail: [jianhuashen@ecust.edu.cn](mailto:jianhuashen@ecust.edu.cn), [yhzhu@ecust.edu.cn](mailto:yhzhu@ecust.edu.cn)

Prof. X. Yang  
National Demonstration Center for Experimental Materials Education, East China  
University of Science and Technology, 130 Meilong Road, Shanghai, 200237, China

Prof. C. Li  
School of Chemical Engineering, East China University of Science and Technology,  
130 Meilong Road, Shanghai, 200237, China  
E-mail: [czli@ecust.edu.cn](mailto:czli@ecust.edu.cn)

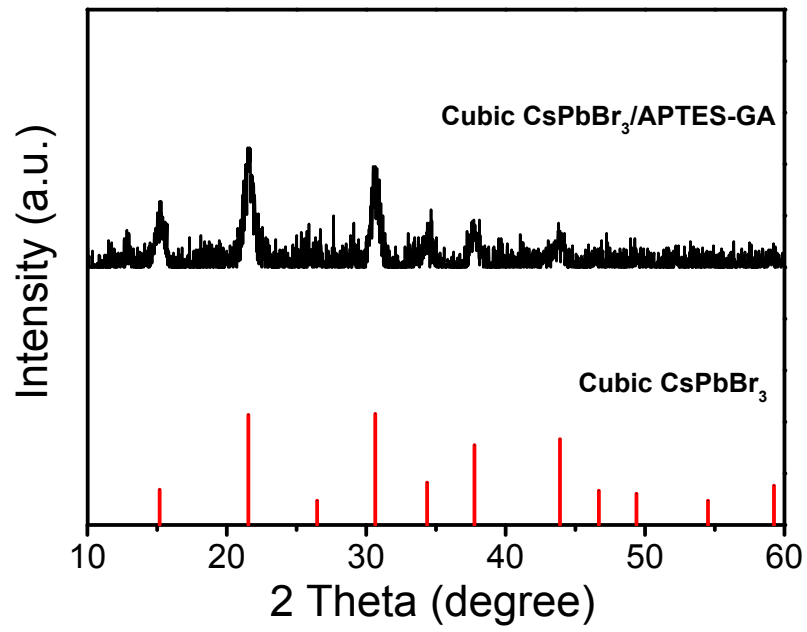

**Figure S1** X-ray diffraction (XRD) pattern (Cu K $\alpha$ ) of CsPbBr<sub>3</sub> QDs/APTES-GA (black) with the standard XRD pattern of cubic CsPbBr<sub>3</sub> (Red).

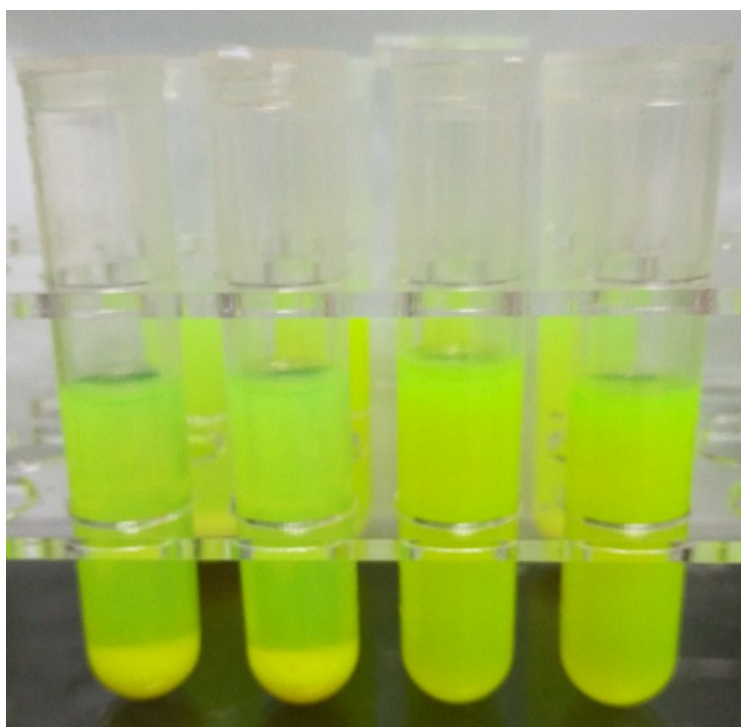

**Figure S2** CsPbBr<sub>3</sub> QDs/APTES-GA dispersed in toluene (left) and ethanol (right) after 30-day storage.

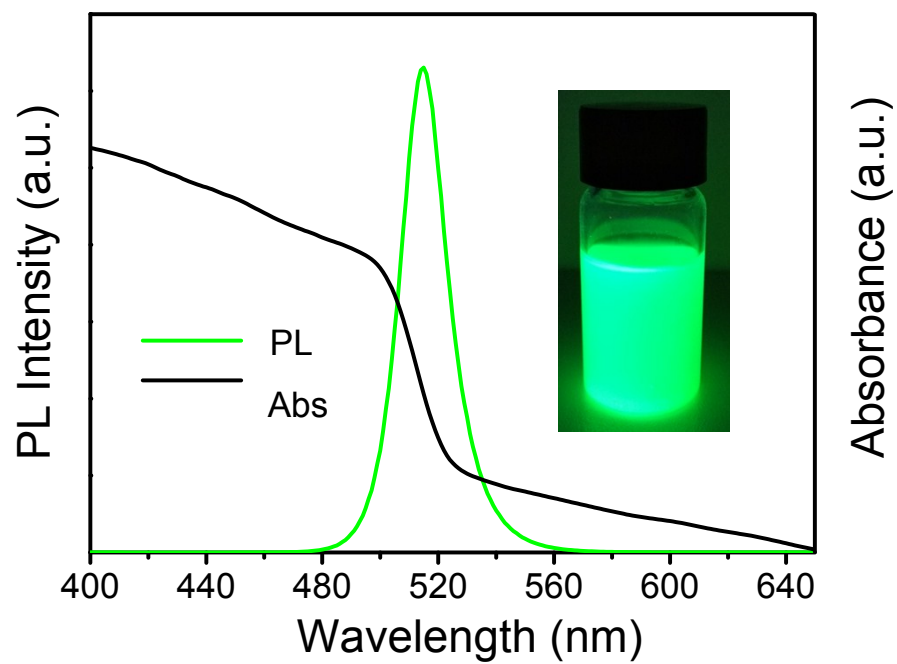

**Figure S3** (a) Absorbance (black) and PL (green) spectrum of CsPbBr<sub>3</sub> QDs/APTES-GA. Inset: CsPbBr<sub>3</sub> QDs/APTES-GA dispersed in ethanol under UV light (365 nm).

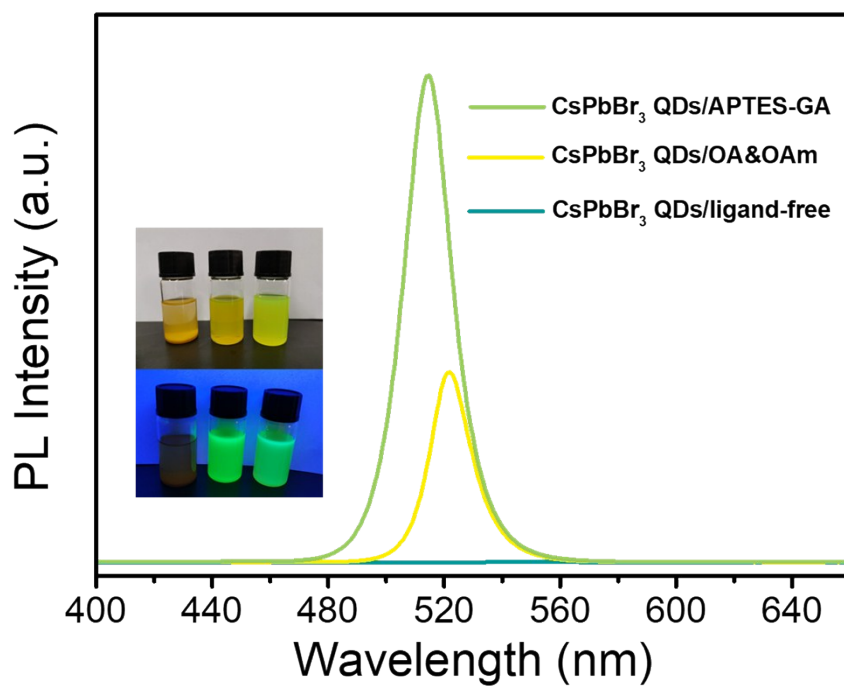

**Figure S4** PL spectra of CsPbBr<sub>3</sub> QDs/APTES-GA, CsPbBr<sub>3</sub> QDs/OA&OAm and CsPbBr<sub>3</sub> QDs/no ligand. Inset: images of three samples under indoor light and UV light (365 nm).

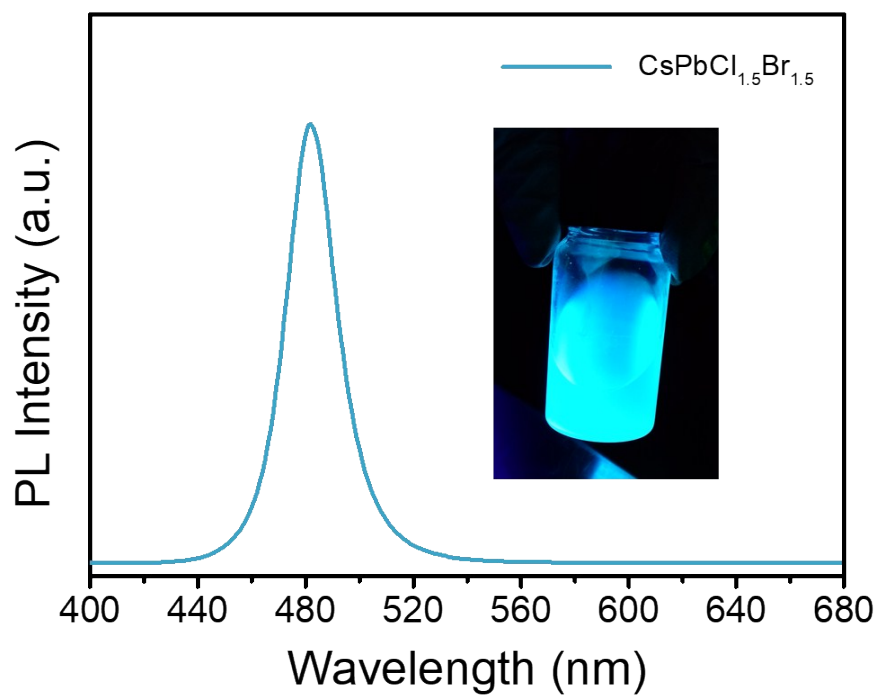

**Figure S5** PL spectrum of CsPbCl<sub>1.5</sub>Br<sub>1.5</sub> QDs/APTES-GA. Inset: CsPbCl<sub>1.5</sub>Br<sub>1.5</sub> QDs/APTES-GA dispersed in ethanol under UV light (365 nm).

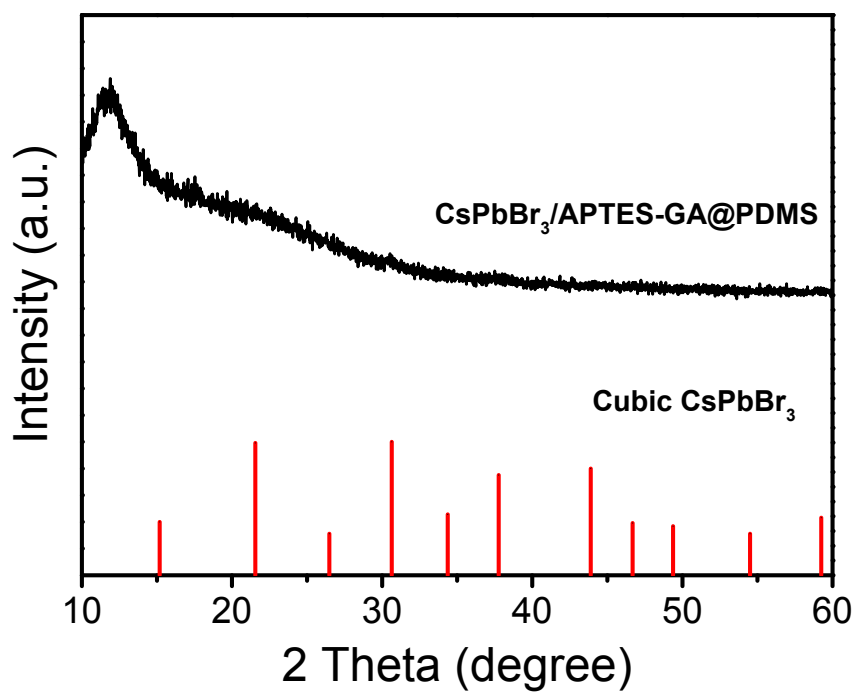

**Figure S6** X-ray diffraction (XRD) pattern ( $\text{Cu K}\alpha$ ) of  $\text{CsPbBr}_3$  QDs/APTES-GA@PDMS composite film (black) with the standard XRD pattern of cubic  $\text{CsPbBr}_3$  (Red).

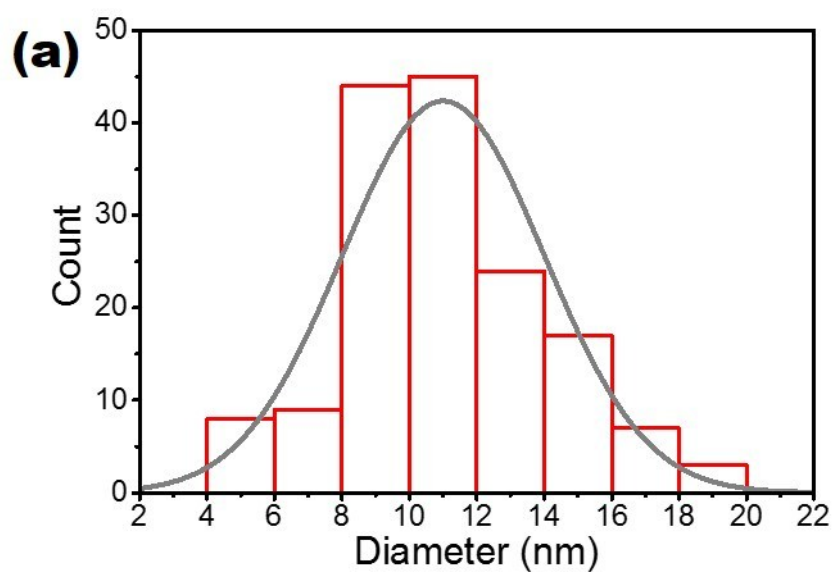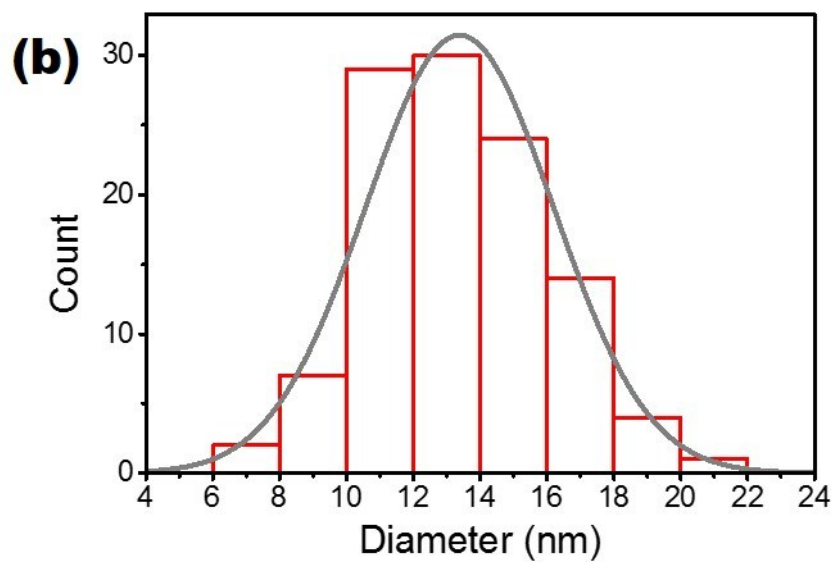

**Figure S7** Size distribution of CsPbBr<sub>3</sub> QDs/APTES-GA in ethanol (a) and in PDMS (b).



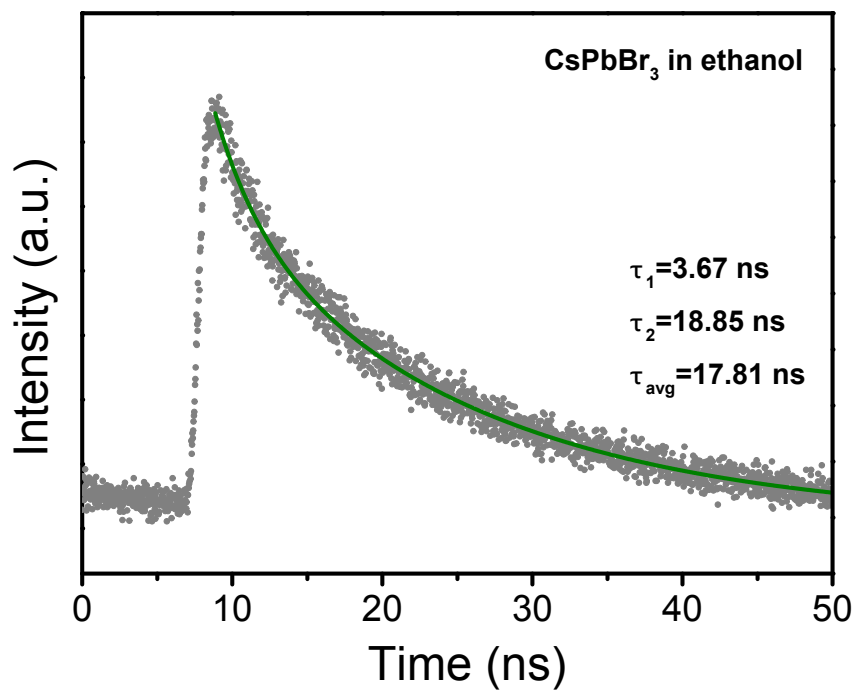

**Figure S8** PL decay curves of CsPbBr<sub>3</sub> QDs in ethanol.

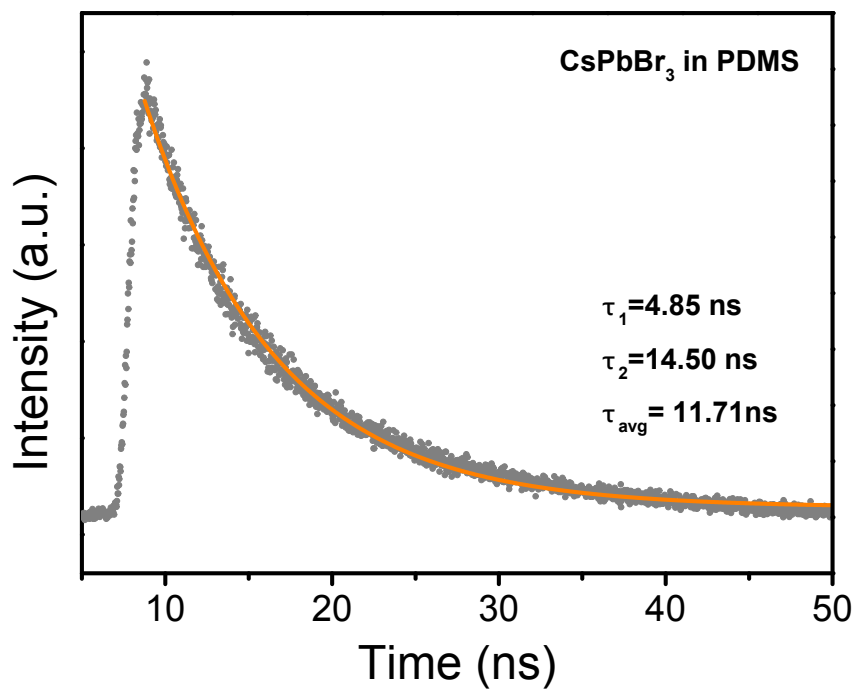

**Figure S9** PL decay curves of CsPbBr<sub>3</sub> QDs in PDMS.

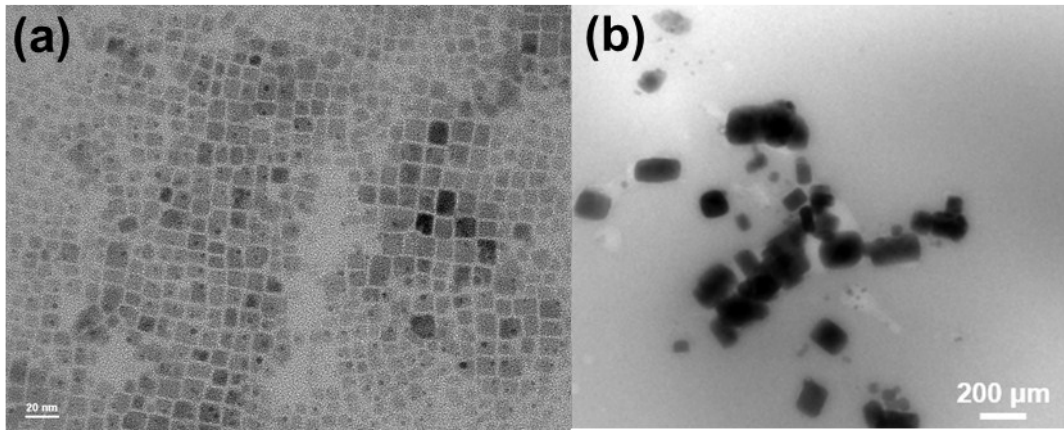

**Figure S10** TEM images of the CsPbBr<sub>3</sub> QDs/OA&OAm in toluene (a) and in PDMS (b).

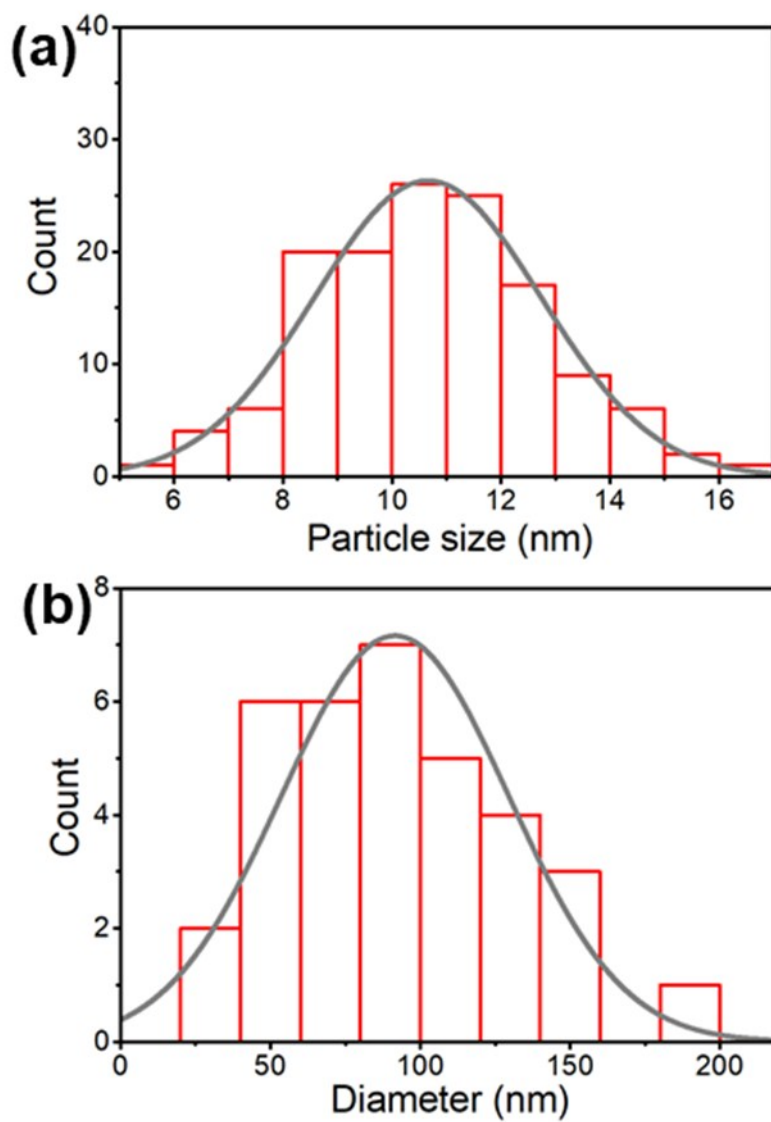

**Figure S11** Size distribution of CsPbBr<sub>3</sub> QDs/OA&OAm in ethanol (a) and in PDMS (b).

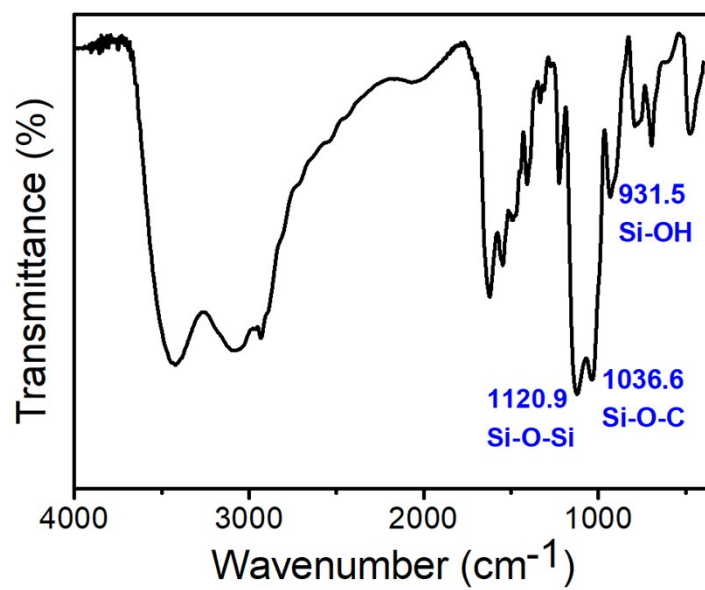

**Figure S12** FTIR characterization of CsPbBr<sub>3</sub> QDs/APTES-GA@PDMS.

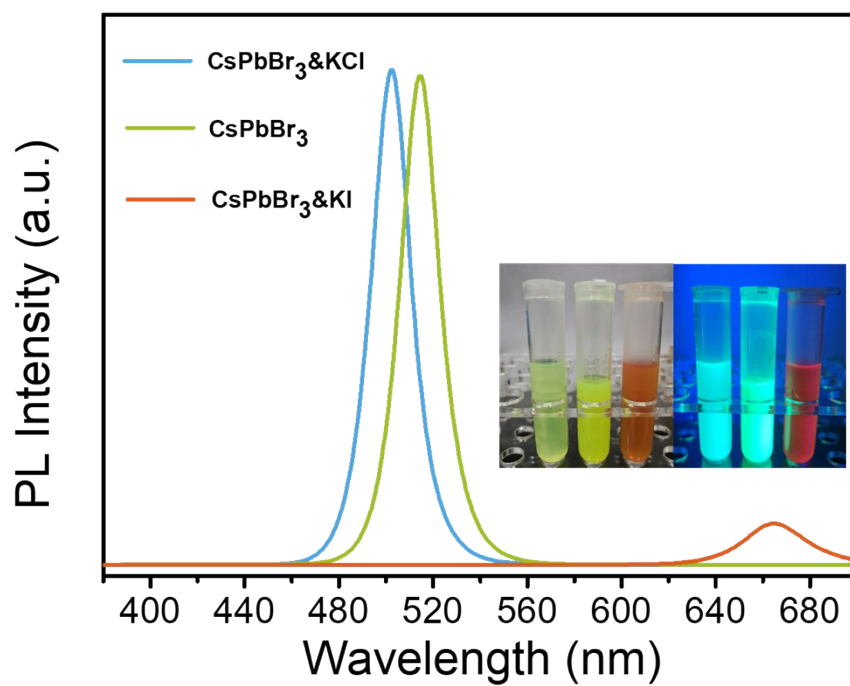

**Figure S13** PL spectra of CsPbBr<sub>3</sub> QDs, CsPbBr<sub>3</sub> QDs&KCl and CsPbBr<sub>3</sub> QDs&KI. Inset: images of three samples under indoor light and UV light (365 nm).

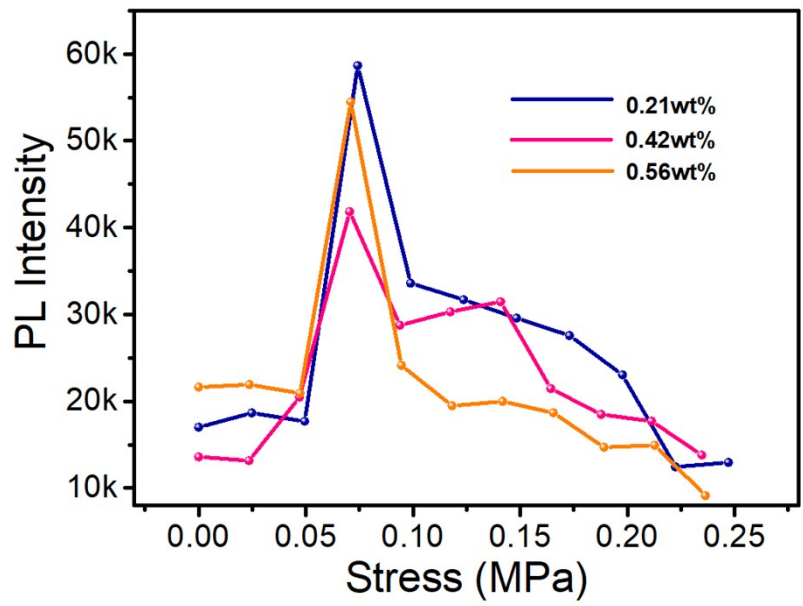

**Figure S14** PL Peak Intensity of CsPbBr<sub>3</sub> QDs/APTES-GA@PDMS composite films with different weight ratios under various tension.

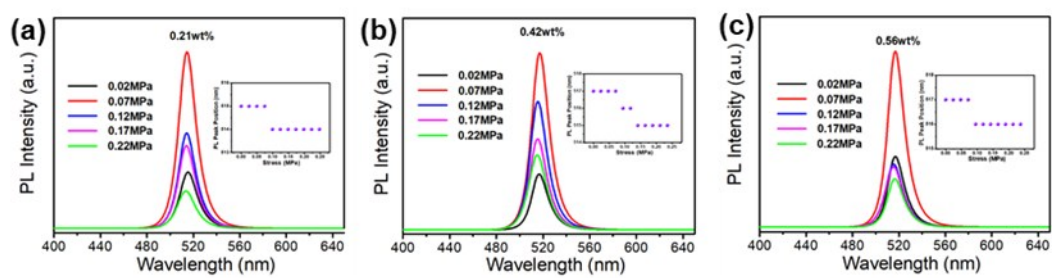

**Figure S15** PL spectra of CsPbBr<sub>3</sub> QDs/APTES-GA@PDMS composite films under various tension. inset: PL Peak Position of composite films under various tension.



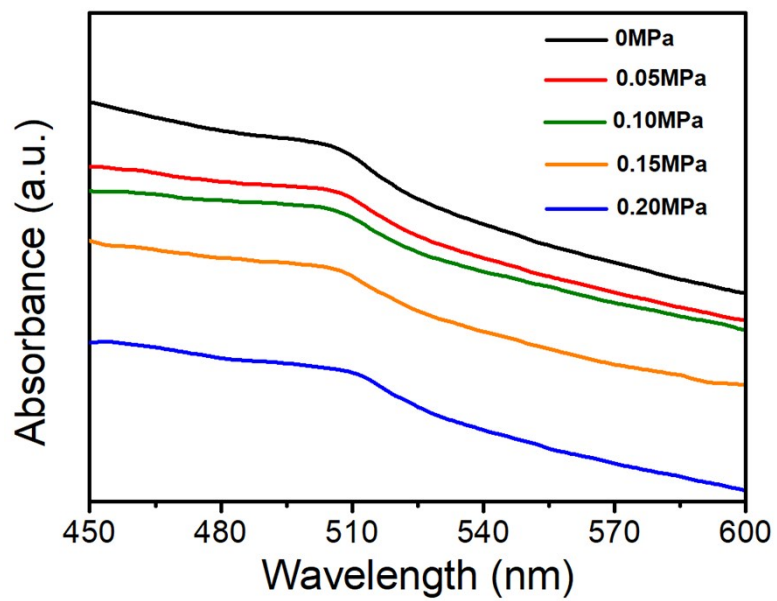

**Figure S16** Absorbance spectra of CsPbBr<sub>3</sub> QDs/APTES-GA@PDMS composite films under various tension.

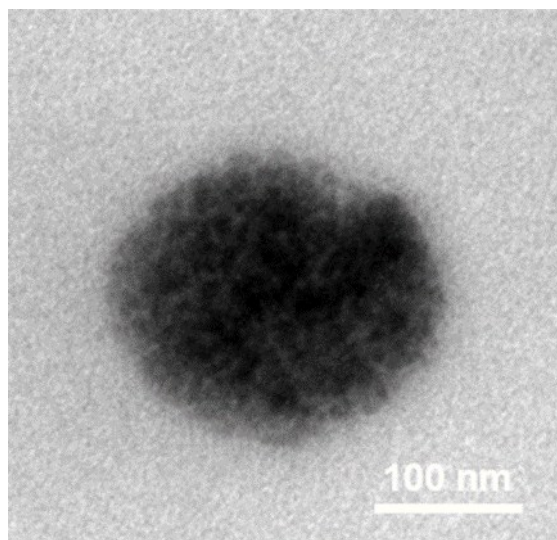

**Figure S17** TEM images of the CPB QDs/ APTES-GA@PDMS composite film.

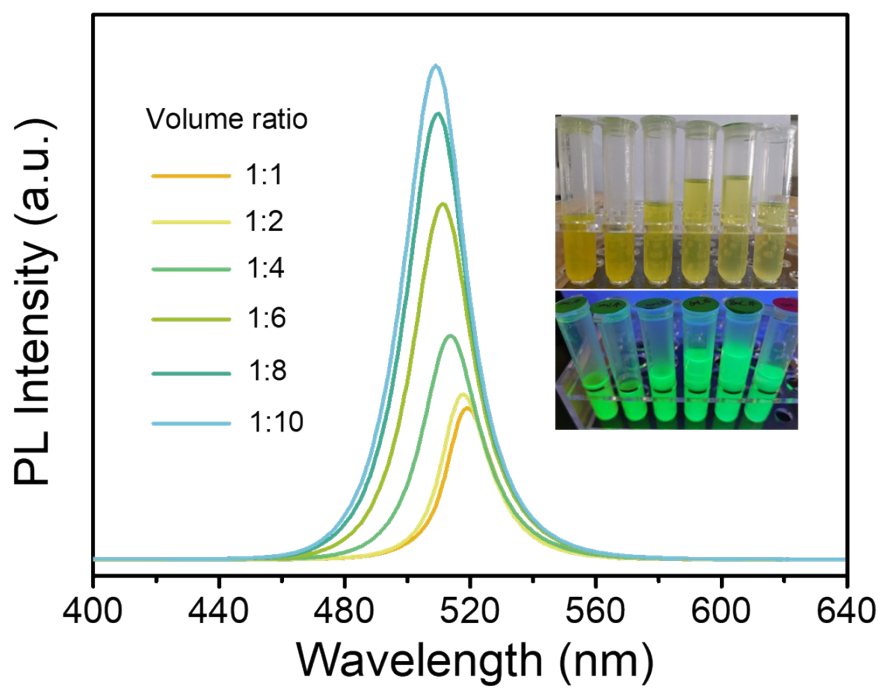

**Figure S18** PL spectra of CsPbBr<sub>3</sub> QDs/ethanol with different volume ratios. Inset: images of six samples under indoor light and UV light (365 nm).

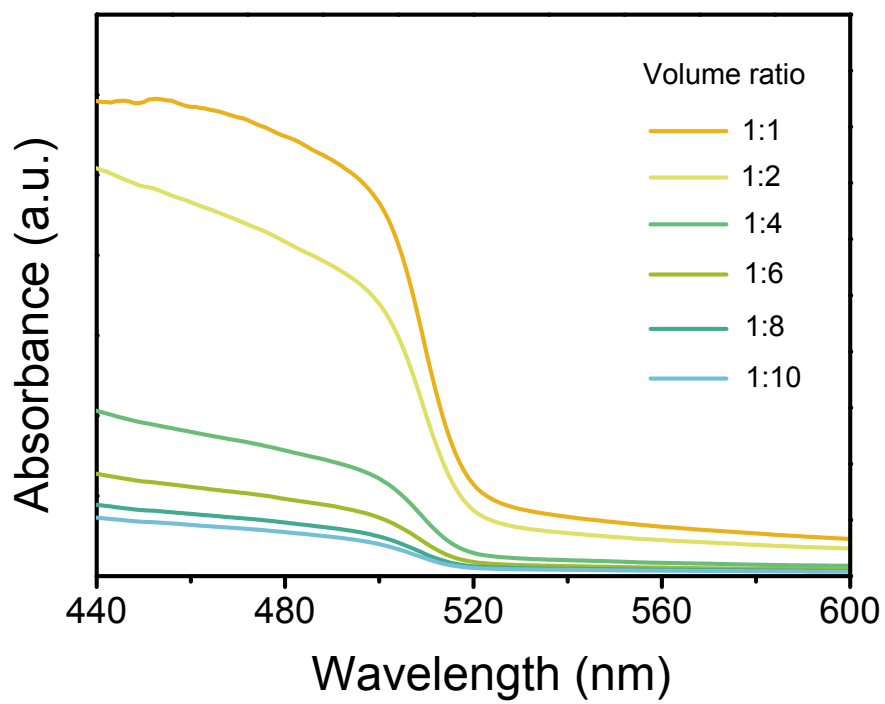

**Figure S19** Absorbance spectra of CsPbBr<sub>3</sub> QDs/ethanol with different volume ratios.
